# Supplementary material for: Copper Distribution and Binding Affinity of Size-Fractioned Humic Substances Taken from Paddy Soil and Correlation with Optical Characteristics
Source: MDPI journal article supplement (doi:10.3390/agronomy12071689), 2022-07-16
Supplement: s1 [file s1]

**Table S1.** The optical indicators and fluorescence intensities for bulk and size-fractioned AEOM at each site.

| Site | Fractioned<br>AEOM | SUVA <sub>254</sub><br>L/mg-C/m | FI        | BIX       |
|------|--------------------|---------------------------------|-----------|-----------|
| S-1  | M-O                | 4.83±2.02                       | 1.41±0.09 | 0.85±0.14 |
|      | M-A                | 4.42±1.93                       | 1.38±0.07 | 0.88±0.18 |
|      | M-B                | 5.50±2.09                       | 1.34±0.08 | 0.72±0.10 |
|      | M-C                | 3.42±1.56                       | 1.48±0.13 | 0.97±0.26 |
|      | M-D                | 1.96±0.79                       | 1.60±0.19 | 1.03±0.27 |
|      | M-E                | 1.81±1.00                       | 1.63±0.13 | 1.09±0.23 |
| S-2  | M-O                | 3.65±1.85                       | 1.55±0.09 | 1.01±0.23 |
|      | M-A                | 3.59±1.43                       | 1.53±0.11 | 1.07±0.26 |
|      | M-B                | 4.48±2.76                       | 1.44±0.08 | 0.80±0.14 |
|      | M-C                | 3.60±3.53                       | 1.60±0.15 | 1.18±0.42 |
|      | M-D                | 2.09±1.09                       | 1.74±0.18 | 1.35±0.46 |
|      | M-E                | 1.89±0.97                       | 1.72±0.13 | 1.33±0.36 |
| S-3  | M-O                | 2.62±0.89                       | 1.49±0.03 | 0.86±0.11 |
|      | M-A                | 3.73±0.76                       | 1.50±0.06 | 0.86±0.13 |
|      | M-B                | 4.35±0.21                       | 1.38±0.02 | 0.67±0.01 |
|      | M-C                | 1.96±0.10                       | 1.52±0.05 | 0.91±0.19 |
|      | M-D                | 1.85±0.39                       | 1.55±0.06 | 0.94±0.22 |
|      | M-E                | 1.74±1.33                       | 1.71±0.05 | 0.17±0.33 |
| S-4  | M-O                | 6.04±1.65                       | 1.40±0.03 | 0.69±0.01 |
|      | M-A                | 7.11±3.11                       | 1.41±0.02 | 0.69±0.00 |
|      | M-B                | 5.77±0.29                       | 1.34±0.03 | 0.63±0.01 |
|      | M-C                | 4.50±2.17                       | 1.43±0.01 | 0.67±0.02 |
|      | M-D                | 3.53±0.64                       | 1.50±0.00 | 0.71±0.02 |
|      | M-E                | 1.84±1.63                       | 1.53±0.02 | 0.78±0.04 |
| S-5  | M-O                | 1.58±1.13                       | 1.50±0.12 | 0.81±0.10 |
|      | M-A                | 4.30±4.81                       | 1.56±0.06 | 0.84±0.04 |
|      | M-B                | 3.27±0.98                       | 1.42±0.03 | 0.70±0.04 |
|      | M-C                | 1.82±1.83                       | 1.58±0.08 | 0.84±0.08 |
|      | M-D                | 1.20±0.34                       | 1.53±0.11 | 0.90±0.07 |
|      | M-E                | 1.50±0.67                       | 1.67±0.06 | 1.02±0.03 |
| S-6  | M-O                | 5.16±1.97                       | 1.44±0.02 | 0.70±0.05 |
|      | M-A                | 4.86±1.70                       | 1.44±0.03 | 0.74±0.01 |
|      | M-B                | 7.22±2.85                       | 1.32±0.01 | 0.65±0.01 |
|      | M-C                | 2.55±0.39                       | 1.45±0.03 | 0.67±0.02 |
|      | M-D                | 2.29±0.12                       | 1.47±0.04 | 0.72±0.09 |

|      |     |           |           |           |
|------|-----|-----------|-----------|-----------|
|      | M-E | 2.35±0.43 | 1.54±0.06 | 0.79±0.08 |
| S-7  | M-O | 1.26±0.33 | 1.68±0.16 | 0.99±0.20 |
|      | M-A | 1.20±0.61 | 1.72±0.13 | 0.95±0.17 |
|      | M-B | 2.72±0.44 | 1.47±0.02 | 0.79±0.01 |
|      | M-C | 1.32±0.44 | 1.68±0.15 | 1.03±0.17 |
|      | M-D | 1.19±0.61 | 1.78±0.09 | 1.15±0.05 |
|      | M-E | 0.88±0.80 | 1.72±0.09 | 1.12±0.26 |
| S-8  | M-O | 2.62±0.60 | 1.52±0.05 | 0.84±0.05 |
|      | M-A | 3.01±0.84 | 1.52±0.02 | 0.83±0.03 |
|      | M-B | 4.48±1.53 | 1.44±0.03 | 0.69±0.02 |
|      | M-C | 3.05±2.04 | 1.57±0.04 | 0.78±0.01 |
|      | M-D | 1.52±0.76 | 1.70±0.06 | 0.88±0.04 |
|      | M-E | 1.38±0.91 | 1.72±0.05 | 1.08±0.12 |
| S-9  | M-O | 1.68±0.71 | 1.60±0.09 | 0.83±0.07 |
|      | M-A | 1.86±0.45 | 1.52±0.08 | 0.83±0.07 |
|      | M-B | 4.58±2.72 | 1.43±0.06 | 0.57±0.26 |
|      | M-C | 0.74±0.22 | 1.61±0.11 | 0.89±0.09 |
|      | M-D | 0.82±0.10 | 1.77±0.27 | 0.89±0.09 |
|      | M-E | 0.29±0.11 | 1.72±0.11 | 1.08±0.14 |
| S-10 | M-O | 3.04±0.62 | 1.50±0.12 | 0.86±0.11 |
|      | M-A | 3.10±0.78 | 1.48±0.09 | 0.89±0.12 |
|      | M-B | 5.29±0.81 | 1.40±0.04 | 0.68±0.03 |
|      | M-C | 1.69±0.22 | 1.53±0.05 | 0.92±0.12 |
|      | M-D | 1.97±1.36 | 1.61±0.05 | 0.98±0.19 |
|      | M-E | 1.82±0.75 | 1.72±0.14 | 1.27±0.41 |
